# Supplementary material for: Differences in small noncoding RNAs profile between bull X and Y sperm
Source: PubMed Central journal article supplement (PMC7505075; doi:10.7717/peerj.9822), 2020-09-18
Supplement: peerj-08-9822-s012.pdf [file peerj-08-9822-s012.pdf]

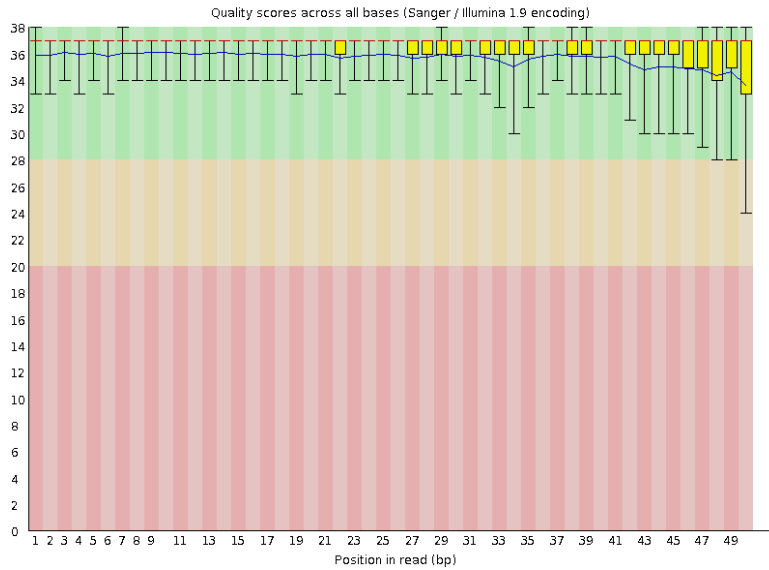

X4069

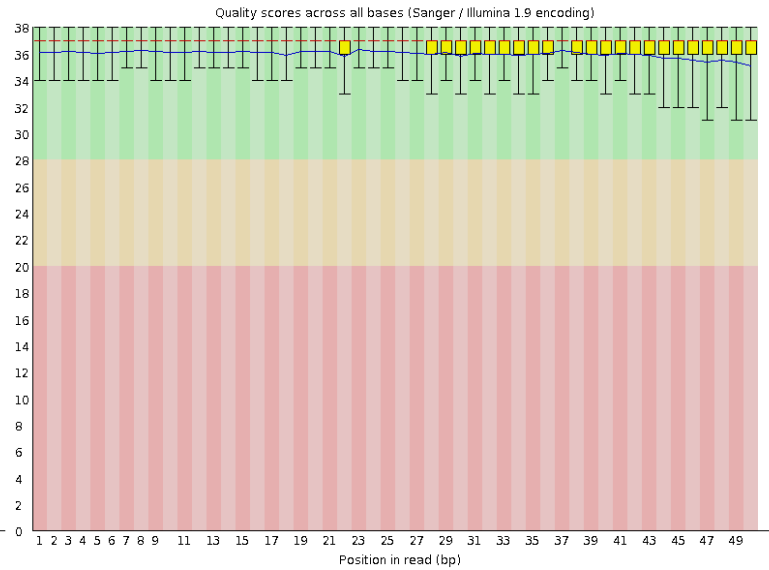

X4118

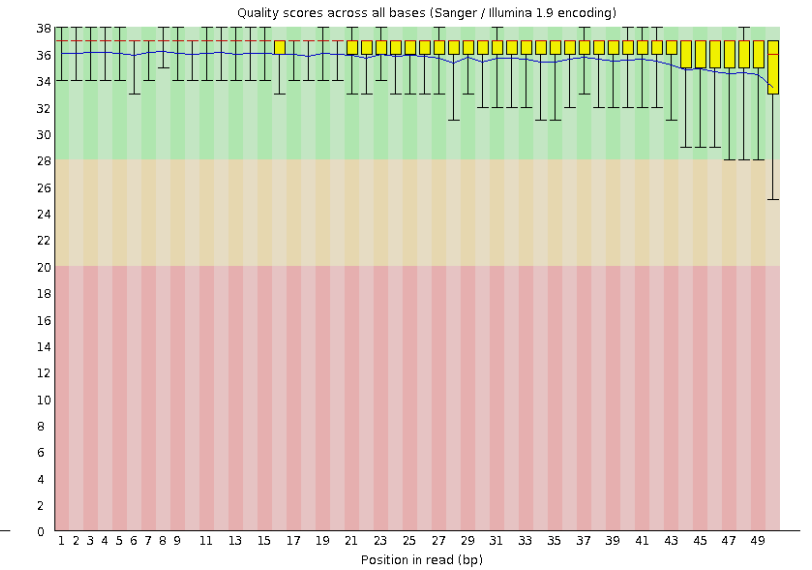

X4131

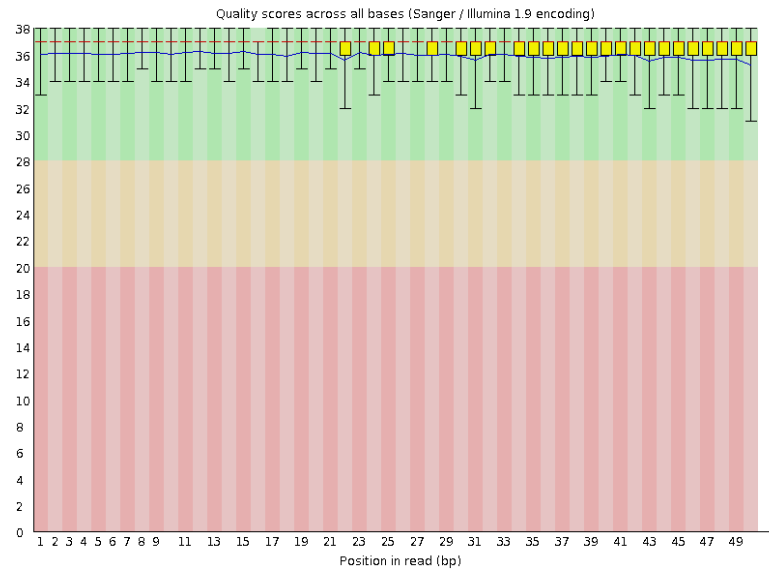

Y4069

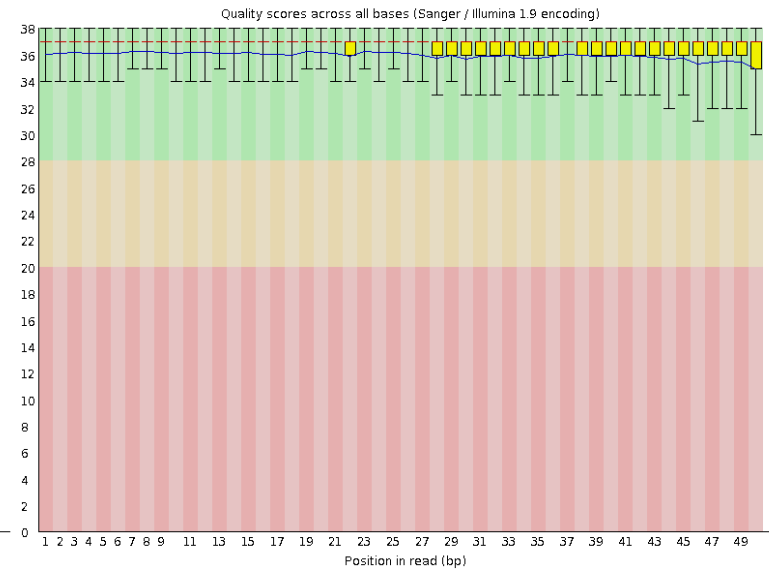

Y4118

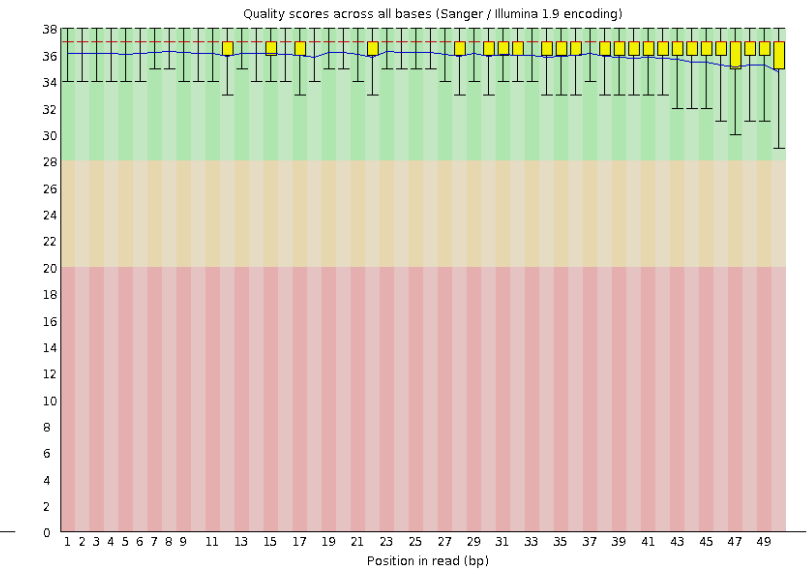

Y4131

The plot of per base sequence quality of raw sequencing data. The y-axis on the graph shows the quality scores. The higher the score the better the base call. The background of the graph divides the y axis into very good quality calls (green), calls of reasonable quality (orange), and calls of poor quality (red).

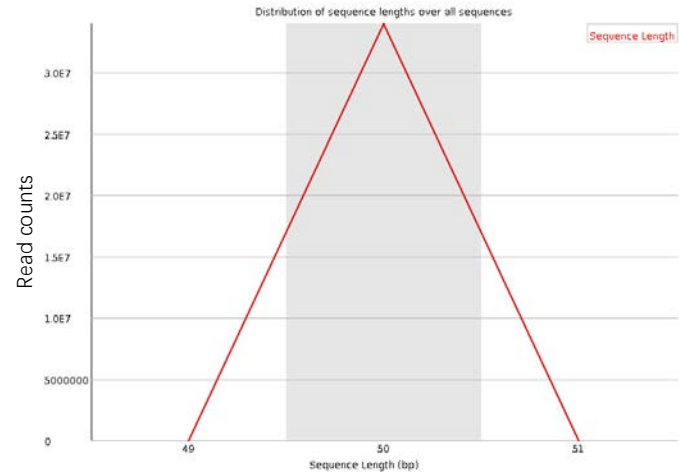

X4069

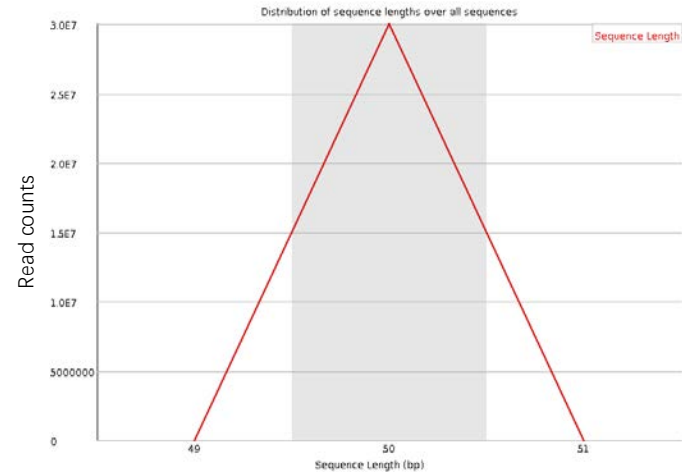

X4118

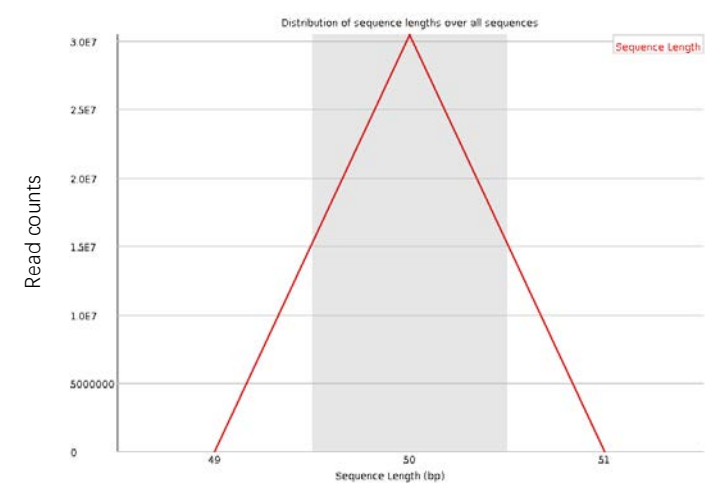

X4131

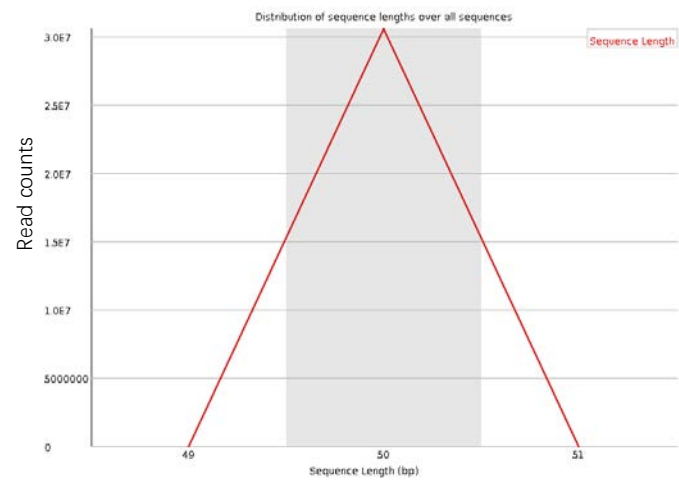

Y4069

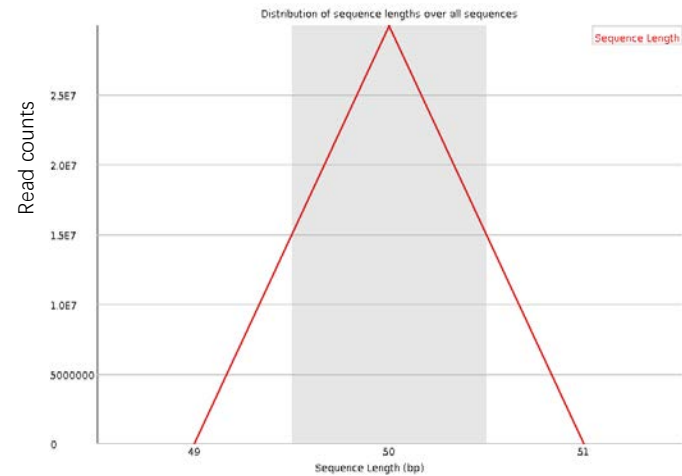

Y4118

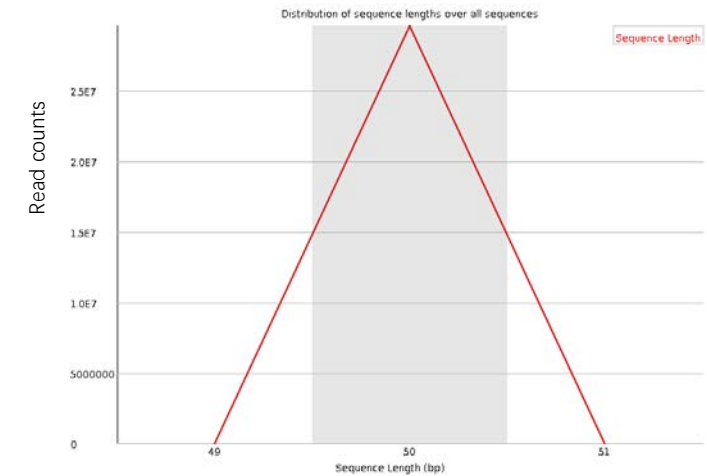

Y4131

The plot of raw sequencing reads distribution.
